# Supplementary material
Source: publisher figshare collection journal article supplement (https://sage.figshare.com/ndownloader/files/12370970)
Supplement: Supplementary file 2 [file 12370970]

Archive with 2 entries (2 files):
- Appendix A population density R1.pdf
- Appendix B dates R1.pdf
