# Supplementary material
Source: publisher figshare collection journal article supplement (https://sage.figshare.com/ndownloader/files/12370970)
Supplement: Supplementary file 2 [file 12370970 › Appendix B dates R1.pdf]

**Appendix B: Age estimates per site**

Table B.1. Age estimates used for the drift-sand activity in the northern sand area.

| Northern sand area (N)         |        |        |                    |                 |                           |              |            |                                                                        |                                                                        |
|--------------------------------|--------|--------|--------------------|-----------------|---------------------------|--------------|------------|------------------------------------------------------------------------|------------------------------------------------------------------------|
| Site                           | XCO    | YCO    | Type <sup>1)</sup> | SampleID        | Age <sup>2)</sup>         | Age error 1σ | Phase      | References                                                             | Notes                                                                  |
| Berkenheuvel (Beh)             |        |        |                    |                 |                           |              |            |                                                                        |                                                                        |
| Berkenheuvel 1                 | 216700 | 543400 | <sup>14</sup> C    | GrN-16156       | 710                       | 70           | ACTIVITY   | Castel (1991); Koster et al. (1993)                                    | After first influx, before large-scale influx                          |
| Berkenheuvel 4                 | 216700 | 543400 | <sup>14</sup> C    | GrN-17066       | 3875                      | 50           | TPQ        | Castel (1991); Koster et al. (1993)                                    | Begin peat                                                             |
| Boschoord (Brd)                |        |        |                    |                 |                           |              |            |                                                                        |                                                                        |
| Boschoord 1                    | 212200 | 545000 | <sup>14</sup> C    | GrN-16157       | 760                       | 110          | ACTIVITY   | Castel (1991); Koster et al. (1993)                                    | After first influx, before large-scale influx                          |
| Boschoord 3                    | 212200 | 545000 | <sup>14</sup> C    | GrN-17061       | 4925                      | 90           | BEGIN PEAT | Castel (1991); Koster et al. (1993)                                    | Begin peat                                                             |
| Een (Een)                      |        |        |                    |                 |                           |              |            |                                                                        |                                                                        |
| Een                            | 221800 | 565400 | ARCH               | -               | LIR                       |              | ACTIVITY   | Van der Waals (1962;1963); Van Gijn and Waterbolk (1984)               |                                                                        |
| Emmen-Emmerhout (Emh)          |        |        |                    |                 |                           |              |            |                                                                        |                                                                        |
| Emmen-Emmerhout 1              | 259800 | 535400 | ARCH               | -               | LNEO (2850-2000 BC)       |              | TPQ        | Waterbolk (1959); Van Gijn and Waterbolk (1984)                        |                                                                        |
| Emmen-Emmerhout 2              | 259800 | 535400 | ARCH               | -               | Elp (1300-800BC)          |              | TAQ/TPQ    | Waterbolk (1959); Van Gijn and Waterbolk (1984)                        |                                                                        |
| Emmen-Emmerhout 3              | 259800 | 535400 | ARCH               | -               | MBR (1800-1100 BC)        |              | TPQ        | Waterbolk (1959); Van Gijn and Waterbolk (1984)                        |                                                                        |
| Emmerdennen (Emd)              |        |        |                    |                 |                           |              |            |                                                                        |                                                                        |
| Emmerdennen 1                  | 258600 | 535500 | <sup>14</sup> C    | GrN-16158       | 245                       | 40           | ACTIVITY   | Castel (1991); Koster et al. (1993)                                    | After first influx, before large-scale influx                          |
| Emmerdennen 6                  | 258600 | 535500 | <sup>14</sup> C    | GrN-17059       | 2650                      | 50           | BEGIN PEAT | Castel (1991); Koster et al. (1993)                                    | Begin peat                                                             |
| Grollo (Glo)                   |        |        |                    |                 |                           |              |            |                                                                        |                                                                        |
| Grollo                         | 240000 | 552000 | ARCH               | -               | LIR-EMA (250 BC -AD 1050) |              | TAQ        | De Roo (1953); Van Gijn and Waterbolk (1984)                           |                                                                        |
| Havelte (taken together) (Hav) |        |        |                    |                 |                           |              |            |                                                                        |                                                                        |
| Havelte Meerkamp               | 211500 | 534750 | ARCH               | -               | Subboreal-LIR             |              | TAQ        | Van Giffen (1951); Van Gijn and Waterbolk (1984)                       | Peat underlying drift sand                                             |
| Havelte Meerkamp               | 211500 | 534750 | ARCH               | -               | EIR (800-500 BC)          |              | TPQ        | Van Giffen (1951); Van Gijn and Waterbolk (1984)                       | Bracelet in barrow on top of drift sand                                |
| Havelte Studentenpad           | 211500 | 534750 | ARCH               | -               | IR (800-12BC)             |              | TPQ        | Waterbolk and Van Andel (1951); Van Gijn and Waterbolk (1984)          |                                                                        |
| Havelte Kogelvanger            | 211500 | 534750 | ARCH               | -               | EIR (800-500 BC)          |              | TPQ        | Taayke et al. (1978); Van Gijn and Waterbolk (1984)                    |                                                                        |
| Heuvingerzand (Hez)            |        |        |                    |                 |                           |              |            |                                                                        |                                                                        |
| Heuvingerzand 1                | 233800 | 547450 | <sup>14</sup> C    | GrN-16159       | 120                       | 70           | ACTIVITY   | Castel (1991); Koster et al. (1993)                                    | After first influx, before large-scale influx                          |
| Heuvingerzand 3                | 233800 | 547450 | <sup>14</sup> C    | GrN-17062       | 1780                      | 60           | BEGIN PEAT | Castel (1991); Koster et al. (1993)                                    | Begin peat                                                             |
| Hijken (Hkn)                   |        |        |                    |                 |                           |              |            |                                                                        |                                                                        |
| Hijken 1                       | 230000 | 546000 | ARCH               | -               | MBR-MIR (1800-250BC)      |              | TAQ        | Harsema (1971); Lanting and Mook (1977); Van Gijn and Waterbolk (1984) | On top of celtic fields                                                |
| Hijken 2                       | 230000 | 546000 | ARCH               | <sup>14</sup> C | 2300                      |              | TPQ        | Lantink and Mook (1977); Van Gijn and Waterbolk (1984)                 |                                                                        |
| Kraloo (Kra)                   |        |        |                    |                 |                           |              |            |                                                                        |                                                                        |
| Kraloo 1                       | 225800 | 535100 | <sup>14</sup> C    | GrN-16162       | 500                       | 80           | TPQ        | Castel (1991); Koster et al. (1993)                                    |                                                                        |
| Laaghalen (Lgh)                |        |        |                    |                 |                           |              |            |                                                                        |                                                                        |
| Laaghalen                      | 231500 | 549000 | ARCH               | -               | LIR-ROM (250 BC-AD 450)   |              | TPQ        | Van Gijn and Waterbolk (1984)                                          |                                                                        |
| Messchenveld (Mev)             |        |        |                    |                 |                           |              |            |                                                                        |                                                                        |
| Messchenveld                   | 234826 | 560630 | OSL                | NCL-7106028     | 270                       | 20           |            | LumiD                                                                  |                                                                        |
| Noordsleen (Nsl)               |        |        |                    |                 |                           |              |            |                                                                        |                                                                        |
| Noordsleen                     | 248300 | 537400 | ARCH               | -               | LIR (500-12 BC)           |              | TPQ        | Van der Waals (1962); Van Gijn and Waterbolk (1984)                    | Sand on celtic fields                                                  |
| Odoorn (Odn)                   |        |        |                    |                 |                           |              |            |                                                                        |                                                                        |
| Odoorn 1                       | 253280 | 540890 | <sup>14</sup> C    | GrN-6624        | 1645                      | 30           | TPQ fase 1 | Lanting and Mook (1977); Van Gijn and Waterbolk (1984)                 |                                                                        |
| Odoorn 2                       | 253280 | 540890 | ARCH               | -               | EMA (AD 450-1050)         |              | TAQ fase 1 | Van Gijn and Waterbolk (1984)                                          |                                                                        |
| Odoorn 3                       | 253280 | 540890 | ARCH               | -               | LMA (AD 1050-1500)        |              | TPQ fase 2 | Van Gijn and Waterbolk (1984)                                          | Youngest driftsand on 9/10 <sup>th</sup> century archaeological finds. |

|                        |        |        |                 |             |                           |     |          |                                                                            |                                               |
|------------------------|--------|--------|-----------------|-------------|---------------------------|-----|----------|----------------------------------------------------------------------------|-----------------------------------------------|
| Schipborg (Scb)        |        |        |                 |             |                           |     |          |                                                                            |                                               |
| Schipborg 2            | 240983 | 565193 | OSL             | NCL-2315150 | 1330                      | 90  |          | Candel et al. (2016)                                                       | Sand layer in brook valley peat               |
| Schipborg 3            | 240983 | 565193 | OSL             | NCL-2315151 | 2210                      | 120 |          | Candel et al. (2016)                                                       | Sand layer in brook valley peat               |
| Schipborg 4            | 240983 | 565193 | OSL             | NCL-2315152 | 2460                      | 140 |          | Candel et al. (2016)                                                       | Sand layer in brook valley peat               |
| Sleenerzand (Slz)      |        |        |                 |             |                           |     |          |                                                                            |                                               |
| Sleenerzand 1          | 249000 | 536300 | <sup>14</sup> C | GrN-16163   | 370                       | 60  | ACTIVITY | Castel (1991); Koster et al. (1993)<br>Castel (1991); Koster et al. (1993) | After first influx, before large-scale influx |
| Sleenerzand 6          | 249000 | 536300 | <sup>14</sup> C | GrN-17063   | 1870                      | 60  | TPQ      |                                                                            | Begin peat                                    |
| Ter Horsterzand (Thz)  |        |        |                 |             |                           |     |          |                                                                            |                                               |
| Ter Horsterzand 1      | 229500 | 539600 | <sup>14</sup> C | GrN-16161   | 240                       | 60  | ACTIVITY | Castel (1991); Koster et al. (1993)<br>Castel (1991); Koster et al. (1993) | After first influx, before large-scale influx |
| Ter Horsterzand 3      | 229500 | 539600 | <sup>14</sup> C | GrN-16160   | 510                       | 90  | TPQ      |                                                                            | Begin of first influx                         |
| Ter Horsterzand 7      | 229500 | 539600 | <sup>14</sup> C | GrN-17057   | 5060                      | 60  | TPQ      | Castel (1991); Koster et al. (1993)                                        | Begin peat                                    |
| Vries (Vrs)            |        |        |                 |             |                           |     |          |                                                                            |                                               |
| Vries                  | 234000 | 565600 | ARCH            | -           | LIR (250-12 BC)           |     | ACTIVITY | Van Es (1958); Waterbolk (1977); Van Gijn and Waterbolk (1984)             | Sand drift during habitation                  |
| Wijster Emelange (WEm) |        |        |                 |             |                           |     |          |                                                                            |                                               |
| Wijster Emelange 1     | 231950 | 538750 | ARCH            | -           | LBR-EIR (1100-800 BC)     |     | MAX/TAQ  | Waterbolk (1957); Van Gijn and Waterbolk (1984)                            |                                               |
| Wijster Looveen (WLv)  |        |        |                 |             |                           |     |          |                                                                            |                                               |
| Wijster Looveen 1      | 231400 | 538700 | ARCH            | -           | 2-4 <sup>th</sup> century |     | TAQ      | Van Es (1965); Van Gijn and Waterbolk (1984)                               | phase 1                                       |
| Wijster Looveen 2      | 231400 | 538700 | ARCH            | -           | 5-6 <sup>th</sup> century |     | TPQ      | Van Es (1965); Van Gijn and Waterbolk (1984)                               | phase 2                                       |
| Wijster Looveen 3      | 231400 | 538700 | ARCH            | -           | EMA (AD 450-1050)         |     | TAQ      | Van Es (1965); Van Gijn and Waterbolk (1984)                               | phase 2                                       |
| Zeegse Duinen (Zgd)    |        |        |                 |             |                           |     |          |                                                                            |                                               |
| Zeegse Duinen 1        | 240000 | 565800 | <sup>14</sup> C | GrN-16164   | 285                       | 45  | ACTIVITY | Castel (1991); Koster et al. (1993)                                        | After first influx, before large-scale influx |
| Zeegse Duinen 4        | 240000 | 565800 | <sup>14</sup> C | GrN-17065   | 4080                      | 80  | TPQ      | Castel (1991); Koster et al. (1993)                                        | Begin peat                                    |

<sup>1)</sup> Type of age estimates: ARCH Archaeological ages, HIST historical ages. <sup>2)</sup>Age for <sup>14</sup>C is <sup>14</sup>C age BP, for OSL age, age before sampling. NEO - Neolithic (5300-2000 BC), BR - Bronze Age (2000-800 BC) IR - Iron Age (800-12BC), ROM - Roman Age (12 BC- AD 450), EMA - Early middle ages (AD 450-1050).

| Eastern sand area (E)       |        |        |                    |             |                             |                 |          |                                                                    |                                                     |
|-----------------------------|--------|--------|--------------------|-------------|-----------------------------|-----------------|----------|--------------------------------------------------------------------|-----------------------------------------------------|
| Site                        | XCO    | YCO    | Type <sup>1)</sup> | SampleID    | Age <sup>2)</sup>           | Age error<br>1σ | Phase    | References                                                         | Note                                                |
| Arrien (Arn)                |        |        |                    |             |                             |                 |          |                                                                    |                                                     |
| Arrien                      | 229000 | 507000 | HIST               | -           | AD 1530-1680                |                 | ACTIVITY | Bruins (1981)                                                      | Measures against sand drifting, location estimated. |
| Besthmen (Btn)              |        |        |                    |             |                             |                 |          |                                                                    |                                                     |
| Besthmen                    | 225000 | 502500 | HIST               | -           | AD 1650-1680                |                 | ACTIVITY | Bruins (1981)                                                      | Measures against sand drifting, location estimated. |
| Dalmsholte (Dal)            |        |        |                    |             |                             |                 |          |                                                                    |                                                     |
| Dalmsholte                  |        |        | HIST               | -           | AD 1620-1650                |                 | ACTIVITY | Bruins (1981)                                                      | Measures against sand drifting, location estimated. |
| Denekamp De Borchert (DBo)  |        |        |                    |             |                             |                 |          |                                                                    |                                                     |
| Denekamp De Borchert        | 265000 | 488000 | DENDRO             |             | 55 BC                       |                 | TAQ      | Verlinde (2004); Van Beek (2009); Willemse and Groenewoudt (2012)  |                                                     |
| Denekamp De Borchert 1      | 265000 | 488000 | <sup>14</sup> C    | GrN-7451    | 2465                        | 35              | TPQ      | Verlinde (2004); Van Beek (2009); Willemse and Groenewoudt (2012)  |                                                     |
| Deventer Colmschate (DCo)   |        |        |                    |             |                             |                 |          |                                                                    |                                                     |
| Deventer Colmschate         | 211051 | 473558 | ARCH               |             | Before AD 70                |                 | TAQ      | Verlinde and Erdrich (2006)                                        |                                                     |
| Deventer Molenbelt (DMo)    |        |        |                    |             |                             |                 |          |                                                                    |                                                     |
| Deventer Molenbelt 1        | 208075 | 474864 | ARCH               | -           | BR (2000-800 BC)            |                 | TPQ      | Modderman (1955); Hermesen (2005); Willemse and Groenewoudt (2012) |                                                     |
| Deventer Molenbelt 2        | 208075 | 474864 | ARCH               | -           | IR (800-12 BC)              |                 | TAQ      | Hermesen (2005); Willemse and Groenewoudt (2012)                   |                                                     |
| Deventer Munnikenhank (DMu) |        |        |                    |             |                             |                 |          |                                                                    |                                                     |
| Deventer Munnikenhank       | 205500 | 477800 | ARCH               | -           | LNEO-EBR<br>(2850-1800 BC)  |                 | TPQ      | Mittendorff (2013)                                                 | Cultivation layer under drift sand                  |
| Deventer Munnikenhank       | 205500 | 477800 | ARCH               | -           | IR-ROM<br>(800 BC-AD 450)   |                 | TAQ      | Mittendorff (2013)                                                 | Cultivation layer on top of the drift sand          |
| Eerde (Erd)                 |        |        |                    |             |                             |                 |          |                                                                    |                                                     |
| Eerde                       | 227000 | 501000 | HIST               | -           | AD 1560-1590                |                 | ACTIVITY | Bruins (1981)                                                      | Measures against sand drifting, location estimated. |
| Epse (EWa)                  |        |        |                    |             |                             |                 |          |                                                                    |                                                     |
| Epse Waterdijk 1            | 210300 | 471350 | <sup>14</sup> C    | -           | EMA (AD 450-1050)           |                 |          | Verlinde and Erdrich (2006); Van Beek (2009)                       |                                                     |
| Epse Waterdijk 2            | 210300 | 471350 | ARCH               | -           | EBR (2000-1800 BC)          |                 | TPQ      | Willemse and Groenewoudt (2012); Appels (2002)                     |                                                     |
| Epse Waterdijk 3            | 210300 | 471350 | ARCH               | -           | EIR (800-500 BC)            |                 | TAQ      | Appels (2002)                                                      |                                                     |
| Gaanderen (Gan)             |        |        |                    |             |                             |                 |          |                                                                    |                                                     |
| Gaanderen                   | 221160 | 437900 | ARCH               | -           | NEOL/BRONSL<br>(2850-800BC) |                 | TPQ      | Veldman and Kenemans (2005); Willemse and Groenewoudt (2012)       | Cultivation layer under drift sand                  |
| Gaanderen                   | 221160 | 437900 | ARCH               | -           | LIR (250-12 BC)             |                 | TAQ      | Veldman and Kenemans (2005); Willemse and Groenewoudt (2012)       | Cultivation layer on top of the drift sand          |
| Giethmen (Gtn)              |        |        |                    |             |                             |                 |          |                                                                    |                                                     |
| Giethmen                    | 223000 | 501000 | HIST               | -           | AD 1530-1710                |                 | ACTIVITY | Bruins (1981)                                                      | Measures against sand drifting, location estimated. |
| Hessum (Hsm)                |        |        |                    |             |                             |                 |          |                                                                    |                                                     |
| Hessum                      | 217000 | 503000 | Arch               | -           | MIR-LIR (500-12 BC)         |                 | TAQ      | Verlinde (2001); Van Beek (2009)                                   |                                                     |
| Hessum                      | 217000 | 502340 | HIST               | -           | AD 1620-1710                |                 | ACTIVITY | Bruins (1981)                                                      | Measures against sand drifting, location estimated. |
| Junner Koeland (Jnk)        |        |        |                    |             |                             |                 |          |                                                                    |                                                     |
| Junner Koeland 10           | 228814 | 505790 | OSL                | NCL-2415165 |                             |                 | ACTIVITY | Quik (2016; in prep)                                               | Embargo                                             |
| Junner Koeland 11           | 228824 | 505798 | OSL                | NCL-2415166 |                             |                 | ACTIVITY | Quik (2016; in prep)                                               | Embargo                                             |
| Junner Koeland 9            | 228798 | 505776 | OSL                | NCL-2415164 |                             |                 | ACTIVITY | Quik (2016; in prep)                                               | Embargo                                             |
| Junnerbelten (Jnb)          |        |        |                    |             |                             |                 |          |                                                                    |                                                     |
| Junnerbelten 1              | 230201 | 503787 | OSL                | NCL-2415167 |                             |                 | ACTIVITY | Quik (2016; in prep)                                               | Embargo                                             |
| Junnerbelten 2              | 230190 | 503813 | OSL                | NCL-2415168 |                             |                 | ACTIVITY | Quik (2016; in prep)                                               | Embargo                                             |

|                           |        |        |                 |             |                       |     |                  |                                                        |                                                     |
|---------------------------|--------|--------|-----------------|-------------|-----------------------|-----|------------------|--------------------------------------------------------|-----------------------------------------------------|
| Junnerbelten 3            | 230194 | 503815 | OSL             | NCL-2415169 |                       |     | ACTIVITY         | Quik (2016; in prep)                                   | Embargo                                             |
| Leusen (Lsn)              |        |        |                 |             |                       |     |                  |                                                        |                                                     |
| Leusen                    | 220000 | 505000 | HIST            | -           | AD 1530-1559          |     | ACTIVITY         | Bruins (1981)                                          | Measures against sand drifting, location estimated. |
| Lutterzand (Lzd)          |        |        |                 |             |                       |     |                  |                                                        |                                                     |
| Lutterzand 1              | 266826 | 483678 | OSL             | GLL-060710  | 310                   | 20  | ACTIVITY         | Vandenberghe et al. (2013)                             |                                                     |
| Lutterzand 2              | 266826 | 483678 | OSL             | GLL-060711  | 300                   | 20  | ACTIVITY         | Vandenberghe et al. (2013)                             |                                                     |
| Lutterzand 3              | 266826 | 483678 | OSL             | GLL-060712  | 290                   | 20  | ACTIVITY         | Vandenberghe et al. (2013)                             |                                                     |
| Lutterzand 4              | 266826 | 483678 | OSL             | GLL-060713  | 400                   | 40  | ACTIVITY         | Vandenberghe et al. (2013)                             |                                                     |
| Lutterzand 5              | 267026 | 483122 | OSL             | GLL-060751  | 210                   | 20  | ACTIVITY         | Vandenberghe et al. (2013)                             |                                                     |
| Lutterzand 6              | 267026 | 483122 | OSL             | GLL-060752  | 200                   | 20  | ACTIVITY         | Vandenberghe et al. (2013)                             |                                                     |
| Lutterzand 7              | 267026 | 483122 | OSL             | GLL-060753  | 210                   | 20  | ACTIVITY         | Vandenberghe et al. (2013)                             |                                                     |
| Lutterzand 8              | 267026 | 483122 | OSL             | GLL-060754  | 350                   | 30  | ACTIVITY         | Vandenberghe et al. (2013)                             |                                                     |
| Lutterzand 9              | 267026 | 483122 | <sup>14</sup> C | UtC-14914   | 1550                  | 43  | TPQ              | Vandenberghe et al. (2013)                             |                                                     |
| Nijverdal Eversberg (NEv) |        |        |                 |             |                       |     |                  |                                                        |                                                     |
| Nijverdal Eversberg 1     | 229520 | 486930 | OSL             | X-5058      | 3380                  | 330 | TPQ              | Gerrets et al. (2012); Willemse and Groenewoudt (2012) | Cultivation layer under drift sand                  |
| Nijverdal Eversberg 2     | 229520 | 486930 | OSL             | X-5059      | 3390                  | 370 | ACTIVITY         | Gerrets et al. (2012); Willemse and Groenewoudt (2012) |                                                     |
| Nijverdal Eversberg 3     | 229520 | 486930 | OSL             | NLC-7611088 | 3290                  | 280 | TPQ              | Gerrets et al. (2012); Willemse and Groenewoudt (2012) | Cultivation layer under drift sand                  |
| Nijverdal Eversberg 4     | 229520 | 486930 | OSL             | NLC-7611087 | 3290                  | 280 | ACTIVITY         | Gerrets et al. (2012); Willemse and Groenewoudt (2012) |                                                     |
| Rechteren-Millingen (Rtn) |        |        |                 |             |                       |     |                  |                                                        |                                                     |
| Rechteren-Millingen       | 216000 | 499000 | HIST            | -           | AD 1530-1710          |     | ACTIVITY         | Bruins (1981)                                          | Measures against sand drifting, location estimated. |
| Stegeren (Stg)            |        |        |                 |             |                       |     |                  |                                                        |                                                     |
| Stegeren                  | 233000 | 507000 | HIST            | -           | AD 1530-1650          |     | ACTIVITY         | Bruins (1981)                                          | Measures against sand drifting, location estimated. |
| Varsen (Var)              |        |        |                 |             |                       |     |                  |                                                        |                                                     |
| Varsen                    | 222000 | 505000 | HIST            | -           | AD 1500-1710          |     | ACTIVITY         | Bruins (1981)                                          | Measures against sand drifting, location estimated. |
| Varsen Varseneres (VrE)   |        |        |                 |             |                       |     |                  |                                                        |                                                     |
| Varsen Varseneres 1       | 223000 | 504000 | <sup>14</sup> C | Poz-43205   | 3520                  | 35  | TPQ              | Willemse and Groenewoudt (2012)                        | Soil date under drift sand                          |
| Varsen Varseneres 2       | 223000 | 504000 | <sup>14</sup> C | Poz-43206   | 2825                  | 35  | TPQ              | Willemse and Groenewoudt (2012)                        | Soil date under drift sand                          |
| Varsener Es 1             | 223000 | 504000 | ARCH            | -           | IR (800-12 BC)        |     | ACTIVITY         | Verlinde (1972); Van Beek (2009)                       |                                                     |
| Varsener Es 2             | 223000 | 504000 | ARCH            | -           | EMA (CAR: AD 725-950) |     | TPQ/TAQ          | Klarenbeek and Verlinde (1982); Van Beek (2009)        |                                                     |
| Wierden (Wrn)             |        |        |                 |             |                       |     |                  |                                                        |                                                     |
| Wierden                   | 236380 | 485350 | <sup>14</sup> C | UtC-13519   | 1492                  | 35  | ACTIVITY/<br>TPQ | Prangsma (2005)                                        | Reworked humic material in drift sand               |
| Wierden                   | 236380 | 485350 | <sup>14</sup> C | UtC-13517   | 4130                  | 39  | TPQ              | Prangsma (2005)                                        | Bottom peat under drift sand                        |
| Wierden                   | 236380 | 485350 | <sup>14</sup> C | UtC-13518   | 1693                  | 35  | TPQ              | Prangsma (2005)                                        | Top peat under drift sand                           |

<sup>1)</sup> Type of age estimates: ARCH Archaeological ages, HIST historical ages. <sup>2)</sup>Age for <sup>14</sup>C is <sup>14</sup>C age BP, for OSL age, age before sampling. NEO - Neolithic (5300-2000 BC), BR - Bronze Age (2000-800 BC) IR - Iron Age (800-12BC), ROM - Roman Age (12 BC- AD 450), EMA - Early middle ages (AD 450-1050).

Table B.3. Age estimates used for the drift-sand activity in the middle sand area.

| Middle sand area (M)               |        |        |                    |                       |                                   |              |          |                                                     |                                                                                                                    |
|------------------------------------|--------|--------|--------------------|-----------------------|-----------------------------------|--------------|----------|-----------------------------------------------------|--------------------------------------------------------------------------------------------------------------------|
| Site                               | XCO    | YCO    | Type <sup>1)</sup> | SampleID              | Age <sup>2)</sup>                 | Age error 1σ | Phase    | References                                          | Notes                                                                                                              |
| Austerlitz (Alz)                   |        |        |                    |                       |                                   |              |          |                                                     |                                                                                                                    |
| Austerlitz 1                       | 150480 | 454645 | OSL                | NCL-5315195           | 776                               | 50           | ACTIVITY | Reimann and Voskuilen (2016)                        | OK                                                                                                                 |
| Austerlitz 2                       | 150480 | 454645 | OSL                | NCL-5315306           | 756                               | 40           | ACTIVITY | Reimann and Voskuilen (2016)                        | OK                                                                                                                 |
| Beekbergen (Beb)                   |        |        |                    |                       |                                   |              |          |                                                     |                                                                                                                    |
| Beekbergen 1                       | 195147 | 459744 | OSL                | NCL-7213003           |                                   |              | ACTIVITY |                                                     | Likely OK, embargo                                                                                                 |
| Beekbergen 2                       | 195147 | 459744 | OSL                | NCL-7213004           |                                   |              | ACTIVITY |                                                     | Likely OK, embargo                                                                                                 |
| Beekbergen 3                       | 195147 | 459744 | OSL                | NCL-7213005           |                                   |              | ACTIVITY |                                                     | Likely OK, embargo                                                                                                 |
| Beekhuizerzand A (Bhz)             |        |        |                    |                       |                                   |              |          |                                                     |                                                                                                                    |
| Beekhuizerzand A                   | 175700 | 483880 | ARCH               | -                     | After 11/12 <sup>th</sup> century |              | TPQ      | Modderman et al. (1976 p41); Lascaris (1993)        |                                                                                                                    |
| Beekhuizerzand B (Bhz)             |        |        |                    |                       |                                   |              |          |                                                     |                                                                                                                    |
| Beekhuizerzand B                   | 175300 | 481400 | HIST               | -                     | AD 1560-1620                      |              | ACTIVITY | Lascaris (1993)                                     | Episodic sand drifting                                                                                             |
| Coldenhove (Chv)                   |        |        |                    |                       |                                   |              |          |                                                     |                                                                                                                    |
| Coldenhove                         | 199560 | 456280 | <sup>14</sup> C    | GrN-7395              | 755                               | 30           | MAX      | Koster (1978); Koster et al. (1993)                 |                                                                                                                    |
| Den Dolder (Dlr)                   |        |        |                    |                       |                                   |              |          |                                                     |                                                                                                                    |
| Den Dolder-Fornheze 1              | 145950 | 461600 | HIST               | -                     | 16 <sup>th</sup>                  |              | ACTIVITY | Van Doesburg (2009); Van Doesburg van Drenth (2009) |                                                                                                                    |
| Den Dolder-Fornheze 2              | 145950 | 461000 | ARCH               | -                     | LMA (AD 1050-1500)                |              | TPQ      | Van Doesburg (2009); Van Doesburg van Drenth (2009) |                                                                                                                    |
| Ermelo-Horst (Eho)                 |        |        |                    |                       |                                   |              |          |                                                     |                                                                                                                    |
| Ermelo-Horst                       | 169000 | 479000 | ARCH               | -                     | after 12e eeuw                    |              | TAQ      | Groenman-Van Waateringe (1988 p58); Lascaris (1993) | Drift sand on archaeological finds, location estimated                                                             |
| Harderwijkerzand (Hwz)             |        |        |                    |                       |                                   |              |          |                                                     |                                                                                                                    |
| Harderwijkerzand                   | 174000 | 481800 | HIST               | -                     | since AD 1560                     |              | ACTIVITY | Wartena (1975); Lascaris (1993; 1999)               | Large-scale sand drifting, middle of the current Harderwijkerzand taken as location.                               |
| Freselsche sant (Harskamp) (Hkz)   |        |        |                    |                       |                                   |              |          |                                                     |                                                                                                                    |
| Harskamp 1                         | 183966 | 462635 | HIST               | -                     | AD 1460-1672                      |              | ACTIVITY | Wartena (1975); Witte (2016)                        | 'Freselsche sant'                                                                                                  |
| Herschcamper sant (Harskamp) (Hkz) |        |        |                    |                       |                                   |              |          |                                                     |                                                                                                                    |
| Harskamp 2                         | 180992 | 461682 | HIST               | -                     | AD 1460-1672                      |              | ACTIVITY | Wartena (1975); Witte (2016)                        | 'Herschcamper sant'                                                                                                |
| Harskamperzand (Hkz)               |        |        |                    |                       |                                   |              |          |                                                     |                                                                                                                    |
| Harskamp 3                         | 183600 | 461800 | HIST               | -                     | AD 1672 onwards                   |              | ACTIVITY | Wartena (1975); Witte (2016)                        | Merging of the 'Freselsche sant' and 'Herschcamper sant' , middle of the current Harskamperzand taken as location. |
| Hierdervelt (Hvd)                  |        |        |                    |                       |                                   |              |          |                                                     |                                                                                                                    |
| Hierdervelt                        | 176000 | 484000 | HIST               | -                     | AD 1470 onwards                   |              | ACTIVITY | Berns (1886); Lascaris (1993; 1999)                 | Onset of large-scale drift-sand development, location estimated                                                    |
| Hoge Veluwe (Hvw)                  |        |        |                    |                       |                                   |              |          |                                                     |                                                                                                                    |
| Hoge Veluwe                        | 185381 | 458410 | <sup>14</sup> C    | SUERC-52989 (GU33982) | 525                               | 29           | TPQ      | <i>This publication</i>                             |                                                                                                                    |
| Hulshorsterzand (Huz)              |        |        |                    |                       |                                   |              |          |                                                     |                                                                                                                    |
| Hulshorsterzand                    | 179000 | 484000 | HIST               | -                     | AD 1560 onwards                   |              | ACTIVITY | Wartena (1975); Lascaris (1993; 1999)               | Large-scale sand drifting, middle of the current Hulshorsterzand taken as location.                                |
| Oud Kootwijk (Okw)                 |        |        |                    |                       |                                   |              |          |                                                     |                                                                                                                    |
| Oud Kootwijk                       | 182551 | 466131 | ARCH               | -                     | AD 750-1000                       |              | TPQ      | Heidinga (1984a; 1984b; 1987)                       | Village covered by drift sand.                                                                                     |
| Kootwijk (Ktw)                     |        |        |                    |                       |                                   |              |          |                                                     |                                                                                                                    |
| Kootwijk 1                         | 183160 | 468870 | <sup>14</sup> C    | GrN-6822              | 900                               | 70           | ACTIVITY | Koster (1978); Koster et al. (1993)                 | Top of the peat, just above first sand influx                                                                      |
| Kootwijk 3                         | 183160 | 468870 | <sup>14</sup> C    | GrN-6824              | 1580                              | 80           | TPQ      | Koster (1978); Koster et al. (1993)                 | Base of the peat                                                                                                   |

|                                   |        |        |                 |             |                    |     |          |                                                     |  |                                      |
|-----------------------------------|--------|--------|-----------------|-------------|--------------------|-----|----------|-----------------------------------------------------|--|--------------------------------------|
| <b>Laarder Wasmeren II (Lwm)</b>  |        |        |                 |             |                    |     |          |                                                     |  |                                      |
| Laarder Wasmeren-II-2             | 143239 | 470812 | OSL             | LWM-II-2    | 4800               | 200 | ACTIVITY | Sevink et al. (2013)                                |  | Drift phase D3 (BC-hor)              |
| Laarder Wasmeren-II-4             | 143239 | 470812 | OSL             | LWM-II-4    | 5800               | 300 | ACTIVITY | Sevink et al. (2013)                                |  | Drift phase D2 (E-hor)               |
| Laarder Wasmeren-II-5             | 143239 | 470812 | OSL             | LWM-II-5    | 6500               | 400 | ACTIVITY | Sevink et al. (2013)                                |  | Drift phase D2 (AE-hor)              |
| Laarder Wasmeren-II-6             | 143239 | 470812 | OSL             | LWM-II-6    | 8800               | 400 | TPQ      | Sevink et al. (2013)                                |  | Coversand (AE-hor)                   |
| <b>Laarder Wasmeren III (Lwm)</b> |        |        |                 |             |                    |     |          |                                                     |  |                                      |
| Laarder Wasmeren-III-10           | 143165 | 470765 | OSL             | LWM-III-10  | 5000               | 200 | ACTIVITY | Sevink et al. (2013)                                |  | Drift phase D3                       |
| Laarder Wasmeren-III-11           | 143165 | 470765 | OSL             | LWM-III-11  | 5000               | 200 | ACTIVITY | Sevink et al. (2013)                                |  | Drift phase D3                       |
| Laarder Wasmeren-III-12           | 143165 | 470765 | OSL             | LWM-III-12  | 5700               | 300 | ACTIVITY | Sevink et al. (2013)                                |  | Drift sand in lake L1                |
| Laarder Wasmeren-III-9            | 143165 | 470765 | OSL             | LWM-III-9   | 5200               | 300 | ACTIVITY | Sevink et al. (2013)                                |  | Drift phase D3                       |
| <b>Laarder Wasmeren V (Lwm)</b>   |        |        |                 |             |                    |     |          |                                                     |  |                                      |
| Laarder Wasmeren-V-27             | 143299 | 470870 | OSL             | LWM-V-27    | 5300               | 200 | ACTIVITY | Sevink et al. (2013)                                |  | Drift phase D3 (BC-hor)              |
| Laarder Wasmeren-V-28             | 143299 | 470870 | OSL             | LWM-V-28    | 6400               | 300 | ACTIVITY | Sevink et al. (2013)                                |  | Drift phase D2 (E-hor)               |
| <b>Laarder Wasmeren VI (Lwm)</b>  |        |        |                 |             |                    |     |          |                                                     |  |                                      |
| Laarder Wasmeren-VI-15            | 143230 | 470663 | OSL             | LWM-VI-15   | 160                | 32  | TAQ      | Sevink et al. (2013)                                |  | Younger cart track in D3             |
| Laarder Wasmeren-VI-16            | 143230 | 470663 | OSL             | LWM-VI-16   | 190                | 22  | TAQ      | Sevink et al. (2013)                                |  | Younger cart track in D3             |
| <b>Laarder Wasmeren VII (Lwm)</b> |        |        |                 |             |                    |     |          |                                                     |  |                                      |
| Laarder Wasmeren-VII              | 143426 | 470620 | <sup>14</sup> C | GrA-47532   | 20 BC              | 40  | TAQ/TPQ  | Sevink et al. (2013)                                |  | Peat between two sand influxes in L2 |
| Laarder Wasmeren-VII-18           | 143426 | 470620 | OSL             | LWM-VII-18  | 617                | 44  | ACTIVITY | Sevink et al. (2013)                                |  | Last sand influx L2, onset D4        |
| Laarder Wasmeren-VII-19           | 143426 | 470620 | OSL             | LWM-VII-19  | 2400               | 100 | ACTIVITY | Sevink et al. (2013)                                |  | First sand influx L2                 |
| Laarder Wasmeren-VII-20           | 143426 | 470620 | OSL             | LWM-VII-20  | 6600               | 400 | ACTIVITY | Sevink et al. (2013)                                |  | Drift phase D2                       |
| <b>Leuvenum (Lvn)</b>             |        |        |                 |             |                    |     |          |                                                     |  |                                      |
| Leuvenum 1                        | 178330 | 480590 | <sup>14</sup> C | GrN-5986    | 760                | 30  | TPQ      | Koster (1978;p124); Koster et al. (1993)            |  | Top of the peat                      |
| Leuvenum 2                        | 178330 | 480590 | <sup>14</sup> C | GrN-5987    | 1910               | 50  | TPQ      | Koster (1978;p124); Koster et al. (1993)            |  | Base of the peat                     |
| <b>Nunspeet (Nun)</b>             |        |        |                 |             |                    |     |          |                                                     |  |                                      |
| Nunspeet Stationslaan             | 181900 | 487425 | OSL             | NCL-7214015 |                    |     | ACTIVITY | Holl (2011)                                         |  | Embargo                              |
| <b>Oud Reemst (Ort)</b>           |        |        |                 |             |                    |     |          |                                                     |  |                                      |
| Oud Reemst 1                      | 184647 | 452956 | OSL             | NCL-9110121 | 1000               | 110 | ACTIVITY | Van Doesburg et al. (2009)                          |  | Ok, Likely ok                        |
| Oud Reemst 2                      | 184647 | 452956 | OSL             | NCL-9110120 | 970                | 70  | ACTIVITY | Van Doesburg et al. (2009)                          |  | Likely ok                            |
| Oud Reemst 3                      | 184647 | 452956 | OSL             | NCL-9110119 | 1950               | 170 | TPQ      | Van Doesburg et al. (2009)                          |  | Soil, Questionable                   |
| Oud Reemst 4                      | 184647 | 452956 | OSL             | NCL-9110118 | 1370               | 120 | TPQ      | Van Doesburg et al. (2009)                          |  | Soil, Likely ok                      |
| <b>Oud Leusden (Oln)</b>          |        |        |                 |             |                    |     |          |                                                     |  |                                      |
| Oud Leusden                       | 154500 | 460000 | ARCH            | -           | 13 <sup>th</sup> C |     | TPQ      | Van Doesburg (2009, 192-193); Van Tent (1985; 1988) |  |                                      |
| <b>Wekeromse zand West (Wkz)</b>  |        |        |                 |             |                    |     |          |                                                     |  |                                      |
| Wekeromse zand 10                 | 174537 | 457010 | OSL             | NCL-2312208 |                    |     | ACTIVITY | Hendriks et al. (in prep)                           |  | Likely OK, embargo                   |
| Wekeromse zand 8                  | 174537 | 457010 | OSL             | NCL-2312206 |                    |     | ACTIVITY | Hendriks et al. (in prep)                           |  | Likely OK, embargo                   |
| Wekeromse zand 9                  | 174537 | 457010 | OSL             | NCL-2312207 |                    |     | ACTIVITY | Hendriks et al. (in prep)                           |  | Likely OK, embargo                   |
| <b>Wekeromse zand East (Wkz)</b>  |        |        |                 |             |                    |     |          |                                                     |  |                                      |
| Wekeromse zand 1                  | 176002 | 458029 | OSL             | NCL-2212198 |                    |     | ACTIVITY | Hendriks et al. (in prep)                           |  | Likely OK, embargo                   |
| Wekeromse zand 2                  | 176002 | 458029 | OSL             | NCL-2212199 |                    |     | ACTIVITY | Hendriks et al. (in prep)                           |  | Likely OK, embargo                   |
| Wekeromse zand 3                  | 176002 | 458029 | OSL             | NCL-2212200 |                    |     | ACTIVITY | Hendriks et al. (in prep)                           |  | Likely OK, embargo                   |
| Wekeromse zand 4                  | 176002 | 458029 | OSL             | NCL-2212201 |                    |     | ACTIVITY | Hendriks et al. (in prep)                           |  | Likely OK, embargo                   |
| Wekeromse zand 5                  | 176002 | 458029 | OSL             | NCL-2212202 |                    |     | ACTIVITY | Hendriks et al. (in prep)                           |  | Likely OK, embargo                   |
| Wekeromse zand 6                  | 176002 | 458029 | OSL             | NCL-2212203 |                    |     | ACTIVITY | Hendriks et al. (in prep)                           |  | Likely OK, embargo                   |
| Wekeromse zand 7                  | 176002 | 458029 | OSL             | NCL-2212204 |                    |     | ACTIVITY | Hendriks et al. (in prep)                           |  | Likely OK, embargo                   |
| Wekeromse zand 11                 | 176002 | 458029 | OSL             | NCL-2212205 |                    |     | TPQ      | Hendriks et al. (in prep)                           |  | Coversand                            |

| Woeste Hoeve (Whv)                                                                                                                                                                                                                                                                                                                                      |        |        |                 |             |     |    |          |                                     |
|---------------------------------------------------------------------------------------------------------------------------------------------------------------------------------------------------------------------------------------------------------------------------------------------------------------------------------------------------------|--------|--------|-----------------|-------------|-----|----|----------|-------------------------------------|
| Woeste Hoeve                                                                                                                                                                                                                                                                                                                                            | 194140 | 457230 | <sup>14</sup> C | GrN-6827    | 695 | 30 | TPQ      | Koster (1978); Koster et al. (1993) |
| Zeist (Zst)                                                                                                                                                                                                                                                                                                                                             |        |        |                 |             |     |    |          |                                     |
| Zeist                                                                                                                                                                                                                                                                                                                                                   | 144811 | 455031 | OSL             | NCL-7412090 | 711 | 48 | ACTIVITY | Van Asch et al. (2015)              |
| Likely OK                                                                                                                                                                                                                                                                                                                                               |        |        |                 |             |     |    |          |                                     |
| <sup>1)</sup> Type of age estimates: ARCH Archaeological ages, HIST historical ages. <sup>2)</sup> Age for <sup>14</sup> C is <sup>14</sup> C age BP, for OSL age, age before sampling. NEO - Neolithic (5300-2000 BC), BR - Bronze Age (2000-800 BC) IR - Iron Age (800-12BC), ROM - Roman Age (12 BC- AD 450), EMA - Early middle ages (AD 450-1050). |        |        |                 |             |     |    |          |                                     |

Table B.4. Age estimates used for the drift-sand activity in the southern sand area.

| Southern sand area (S)                  |        |        |                    |            |                          |                 |          |                                                                  |                                |
|-----------------------------------------|--------|--------|--------------------|------------|--------------------------|-----------------|----------|------------------------------------------------------------------|--------------------------------|
| Site                                    | XCO    | YCO    | Type <sup>1)</sup> | SampleID   | Age <sup>2)</sup>        | Age error<br>1σ | Phase    | References                                                       | Notes                          |
| Bedafse Bergen (Beb)                    |        |        |                    |            |                          |                 |          |                                                                  |                                |
| Bedafse Bergen 1                        | 168100 | 409000 | OSL                |            | 543                      | 40              | ACTIVITY | Doorenbosch and Van Mourik (2016)                                | 2C2-3                          |
| Bedafse Bergen 2                        | 168100 | 409000 | OSL                |            | 591                      | 40              | ACTIVITY | Doorenbosch and Van Mourik (2016)                                | 2C4-5                          |
| Bedafse Bergen 3                        | 168100 | 409000 | OSL                |            | 651                      | 40              | ACTIVITY | Doorenbosch and Van Mourik (2016)                                | 2C6-7                          |
| Bergen op Zoom (Bez)                    |        |        |                    |            |                          |                 |          |                                                                  |                                |
| Bergen op Zoom                          | 78000  | 390000 | ARCH               | -          | 13 <sup>th</sup> century |                 | ACTIVITY | ZMO 2010; Vermunt and Van der Kallen 2012; Leenders 2016         |                                |
| Bergharen Grotestraat (BGs)             |        |        |                    |            |                          |                 |          |                                                                  |                                |
| Bergharen Grotestraat 1                 | 173550 | 429850 | ARCH               | -          | 15 <sup>th</sup> century |                 | TAQ      | Hulst (1972); Willemse and Groenewoudt (2012)                    |                                |
| Bergharen Grotestraat 2                 |        |        |                    | -          | 7 <sup>th</sup> century  |                 | TPQ      | Hulst (1972); Willemse and Groenewoudt (2012)                    |                                |
| Bergharen Kulturhus (BK <sub>h</sub> )  |        |        |                    |            |                          |                 |          |                                                                  |                                |
| Bergharen Kulturhus                     | 174250 | 429180 | ARCH               | -          | 800 BC- AD 50            |                 | TAQ      | Diepeveen and Enckevoort (2009); Willemse and Groenewoudt (2012) |                                |
| Bergharen Kulturhus                     |        |        |                    | -          | 2600 BC                  |                 | TPQ      | Diepeveen and Enckevoort (2009); Willemse and Groenewoudt (2012) |                                |
| Bergharen Wijkseveld (BW <sub>v</sub> ) |        |        |                    |            |                          |                 |          |                                                                  |                                |
| Bergharen Wijkseveld                    | 174250 | 429180 | ARCH               |            | BR (2000-800 BC)         |                 | TPQ      | Hulst (1971); Janssen (1977); Willemse and Groenewoudt (2012)    |                                |
|                                         |        |        |                    |            |                          |                 |          |                                                                  |                                |
| Cuijk De Nielt (CNT)                    |        |        |                    |            |                          |                 |          |                                                                  |                                |
| Cuijk De Nielt 1 (A)                    | 187858 | 417521 | ARCH               | -          | MBR                      |                 | ACTIVITY | Habermehl and van Renswoude 2014                                 |                                |
| Cuijk De Nielt 2 (B)                    | 187858 | 417521 | ARCH               | -          | EIR                      |                 | TAQ      | Habermehl and van Renswoude 2014                                 |                                |
| Cuijk De Nielt 3 (B)                    | 187858 | 417521 | OSL                | Shfd-12058 | 2900                     | 160             | ACTIVITY | Habermehl and van Renswoude 2014                                 | 2900                           |
| Cuijk De Nielt 4 (B)                    | 187962 | 417483 | OSL                | Shfd-12059 | 3120                     | 160             | ACTIVITY | Habermehl and van Renswoude 2014                                 | 3120                           |
| Cuijk De Nielt 5 (B)                    | 187962 | 417483 | ARCH               | -          | LBR (latest part)        |                 | TPQ      | Habermehl and van Renswoude 2014                                 |                                |
| Cuijk De Nielt 6 (C)                    | 187858 | 417521 | ARCH               | -          | EIR                      |                 | TPQ      | Habermehl and van Renswoude 2014                                 |                                |
| Cuijk De Nielt 7 (C)                    | 187858 | 417521 | OSL                | Shfd-12051 | 3720                     | 240             | ACTIVITY | Habermehl and van Renswoude 2014                                 | Too old, bioturbation          |
| Cuijk De Nielt 8 (D)                    | 187962 | 417483 | ARCH               | -          | MROM                     |                 | TAQ      | Habermehl and van Renswoude 2014                                 | Small blow out                 |
| Cuijk De Nielt 9 (D)                    | 187962 | 417483 | ARCH               | -          | EIR                      |                 | TPQ      | Habermehl and van Renswoude 2014                                 | Small blow out                 |
| De Schouw (DS <sub>w</sub> )            |        |        |                    |            |                          |                 |          |                                                                  |                                |
| De Schouw                               | 114000 | 406000 | HIST               | -          |                          |                 | TAQ      | Leenders (2016)                                                  | Measures against sand drifting |
| Defensiedijk (Ddk)                      |        |        |                    |            |                          |                 |          |                                                                  |                                |
| Defensiedijk                            | 171525 | 361994 | OSL                | W49        | 8                        | 8               | ACTIVITY | Van Mourik et al. (2010)                                         | Phase D                        |
| Defensiedijk                            | 171525 | 361994 | OSL                | W54        | 100                      | 10              | ACTIVITY | Van Mourik et al. (2010)                                         | Phase D                        |
| Defensiedijk                            | 171525 | 361994 | OSL                | W48        | 90                       | 10              | ACTIVITY | Van Mourik et al. (2010)                                         | Phase D                        |
| Defensiedijk                            | 171525 | 361994 | OSL                | W44        | 350                      | 30              | ACTIVITY | Van Mourik et al. (2010)                                         | Phase C                        |
| Defensiedijk                            | 171525 | 361994 | OSL                | W3         | 590                      | 50              | ACTIVITY | Van Mourik et al. (2010)                                         | Phase C                        |
| Defensiedijk                            | 171525 | 361994 | OSL                | W46        | 670                      | 60              | ACTIVITY | Van Mourik et al. (2010)                                         | Phase C                        |
| Defensiedijk                            | 171525 | 361994 | OSL                | W14        | 1300                     | 100             | ACTIVITY | Van Mourik et al. (2010)                                         | Phase B                        |
| Defensiedijk                            | 171525 | 361994 | OSL                | W53        | 5800                     | 500             | ACTIVITY | Van Mourik et al. (2010)                                         | Older phase                    |
| Defensiedijk                            | 171525 | 361994 | OSL                | W21        | 4700                     | 400             | ACTIVITY | Van Mourik et al. (2010)                                         | Older phase                    |
| Defensiedijk                            | 171525 | 361994 | OSL                | W24        | 9200                     | 800             | ACTIVITY | Van Mourik et al. (2010)                                         | Older phase                    |
| Defensiedijk 2.1                        | 171512 | 362032 | <sup>14</sup> C    | GrN-13511  | 1395                     | 35              | TPQ      | Van Mourik (1988); Koster et al. (1993)                          | Phase B                        |

|                             |        |        |                 |             |                       |     |                |                                         |                                                 |
|-----------------------------|--------|--------|-----------------|-------------|-----------------------|-----|----------------|-----------------------------------------|-------------------------------------------------|
| Defensiedijk 2.2            | 171512 | 362032 | <sup>14</sup> C | GrN-13512   | 3140                  | 35  | TPQ            | Van Mourik (1988); Koster et al. (1993) | Phase A                                         |
| Defensiedijk 3              | 171525 | 361994 | <sup>14</sup> C | GrN-13514   | 1225                  | 25  | TPQ            | Van Mourik (1988); Koster et al. (1993) | Phase B                                         |
| Deurne (Deu)                |        |        |                 |             |                       |     |                |                                         |                                                 |
| Deurne 1                    | 185040 | 387707 | OSL             | NCL-7712234 | 412                   | 25  | ACTIVITY       | Ellenkamp (2015)                        | Likely OK                                       |
| Deurne 2                    | 185040 | 387707 | OSL             | NCL-7712235 | 457                   | 22  | ACTIVITY       | Ellenkamp (2015)                        | Likely OK                                       |
| Deurne 3                    | 185040 | 387707 | OSL             | NCL-7712236 | 11880                 | 490 | TPQ            | Ellenkamp (2015)                        | Likely OK, coversand under drift sand           |
| Duinse Hoef (Dhf)           |        |        |                 |             |                       |     |                |                                         |                                                 |
| Duinse Hoef                 | 156000 | 416000 | HIST            | -           |                       |     | TAQ            | Leenders (2016)                         | Measures against sand drifting                  |
| Empel (Emp)                 |        |        |                 |             |                       |     |                |                                         |                                                 |
| Empel 1                     | 148800 | 413800 | <sup>14</sup> C | GrN-10008   | 3345                  | 45  | TPQ            | Verwers (1990)                          |                                                 |
| Empel 2                     | 148800 | 413800 | ARCH            | -           | MBR (1800-1100 BC)    |     | TPQ            | Verwers (1990)                          |                                                 |
| Empel 3                     | 148800 | 413800 | ARCH            | -           | IR (800-12 BC)        |     | TAQ            | Verwers (1990)                          |                                                 |
| Geldrop Luchen (GLn)        |        |        |                 |             |                       |     |                |                                         |                                                 |
| Geldrop Luchen              | 169800 | 384000 | ARCH            | -           | LBR/EIA (1100-500 BC) |     | ACTIVITY       | De Leeuwe (2014 )                       | Finds within the driftsand deposits             |
| Gemert-Bakel (GeB)          |        |        |                 |             |                       |     |                |                                         |                                                 |
| Gemert-Bakel                | 179325 | 391100 | ARCH            | -           |                       |     | TAQ            | De Boer (2010)                          |                                                 |
| Giersbergen (Gbn)           |        |        |                 |             |                       |     |                |                                         |                                                 |
| Giersbergen                 | 138600 | 407500 | HIST            | -           |                       |     | ACTIVITY       | Leenders (2016)                         |                                                 |
| Heeswijk (Hwk)              |        |        |                 |             |                       |     |                |                                         |                                                 |
| Heeswijk                    | 162430 | 406660 | OSL             | NCL-7610045 | 1960                  | 10  | ACTIVITY       | Wallinga and Versendaal (2012)          | Likely OK                                       |
| Heeswijk Wildhorst (Wst)    |        |        |                 |             |                       |     |                |                                         |                                                 |
| Heeswijk Wildhorst 1        | 160950 | 408780 | <sup>14</sup> C | GrN 15361   | 1235                  | 50  | TPQ            | Teunissen (1997)                        | Below major sand influx, no roman sand drifting |
| Heeswijk Wildhorst 2        | 160950 | 408780 | <sup>14</sup> C | GrN 15362   | 2770                  | 50  | TAQ            | Teunissen (1997)                        | After small sand influx in peat                 |
| Heeswijk Wildhorst 3        | 160950 | 408780 | <sup>14</sup> C | GrN 15363   | 4620                  | 60  | TPQ            | Teunissen (1997)                        |                                                 |
| Heeswijk Wildhorst 4        | 160950 | 408780 | <sup>14</sup> C | GrN 15364   | 5410                  | 60  | TPQ            | Teunissen (1997)                        | base of the peat                                |
| Heeze Leende (Hld)          |        |        |                 |             |                       |     |                |                                         |                                                 |
| Heeze Leende                | 165080 | 372100 | HIST            | -           |                       |     | TAQ            | Leenders (2016)                         | Windmill on a sand dune                         |
| Herpen (Hrp)                |        |        |                 |             |                       |     |                |                                         |                                                 |
| Herpen                      | 172300 | 420500 | ARCH            |             | LIJZ (500-12 BC)      |     | small ACTIVITY | Ball and Jansen (2002)                  | IR under drift sand, ROM_EMA on top of it.      |
| Herperduin (Hdn)            |        |        |                 |             |                       |     |                |                                         |                                                 |
| Herperduin                  | 170820 | 419290 | <sup>14</sup> C | GrN-16535   | 410                   | 30  | TPQ            | Van Mourik (1988); Koster et al. (1993) |                                                 |
| Kleefsche Beek (Kbk)        |        |        |                 |             |                       |     |                |                                         |                                                 |
| Kleefsche Beek 1            | 196520 | 408970 | <sup>14</sup> C | GrN-13218   | 730                   | 50  | ACTIVITY       | Teunissen (1990)                        | In sandy peat, 10 cm below sand                 |
| Kleefsche Beek 2            | 196520 | 408970 | <sup>14</sup> C | GrN-8873    | 910                   | 70  | TPQ            | Teunissen (1990)                        | Peat under sandy peat                           |
| Loonse Drunese duinen (Ldd) |        |        |                 |             |                       |     |                |                                         |                                                 |
| Loonse Drunese duinen       | 136000 | 406000 | HIST            | -           |                       |     | ACTIVITY       | Leenders (2016)                         |                                                 |
| Loonse duinen               | 133000 | 405000 | HIST            | -           |                       |     | ACTIVITY       | Leenders (2016)                         |                                                 |
| Loonse en Drunese duinen 10 | 136780 | 405550 | OSL             | NCL-2109116 | 150                   | 10  | ACTIVITY       | Wallinga et al. (2012)                  | Likely OK                                       |
| Loonse en Drunese duinen 11 | 136780 | 405550 | OSL             | NCL-2109117 | 140                   | 10  | ACTIVITY       | Wallinga et al. (2012)                  | Likely OK                                       |
| Loonse en Drunese duinen 3  | 136780 | 405550 | OSL             | NCL-2109109 | 130                   | 10  | ACTIVITY       | Wallinga et al. (2012)                  | OK                                              |
| Loonse en Drunese duinen 4  | 136780 | 405550 | OSL             | NCL-2109110 | 120                   | 10  | ACTIVITY       | Wallinga et al. (2012)                  | OK                                              |
| Loonse en Drunese duinen 5  | 136780 | 405550 | OSL             | NCL-2109111 | 130                   | 10  | ACTIVITY       | Wallinga et al. (2012)                  | OK                                              |
| Loonse en Drunese duinen 6  | 136780 | 405550 | OSL             | NCL-2109112 | 130                   | 10  | ACTIVITY       | Wallinga et al. (2012)                  | OK                                              |
| Loonse en Drunese duinen 7  | 136780 | 405550 | OSL             | NCL-2109113 | 130                   | 10  | ACTIVITY       | Wallinga et al. (2012)                  | OK                                              |
| Loonse en Drunese duinen 8  | 136780 | 405550 | OSL             | NCL-2109114 | 130                   | 10  | ACTIVITY       | Wallinga et al. (2012)                  | OK                                              |
| Loonse en Drunese duinen 9  | 136780 | 405550 | OSL             | NCL-2109115 | 140                   | 10  | ACTIVITY       | Wallinga et al. (2012)                  | OK                                              |

|                                     |        |        |                 |             |                                                                          |                          |          |                                                             |                      |
|-------------------------------------|--------|--------|-----------------|-------------|--------------------------------------------------------------------------|--------------------------|----------|-------------------------------------------------------------|----------------------|
| <b>Made (Mst/Mzb)</b>               |        |        |                 |             |                                                                          |                          |          |                                                             |                      |
| Made Stuivezand                     | 112800 | 409500 | HIST            | -           |                                                                          |                          | TAQ      | Leenders (2016)                                             |                      |
| Made Zilverenberg                   | 113000 | 409100 | HIST            | -           |                                                                          |                          | TAQ      | Leenders (2016)                                             |                      |
| <b>Nabbegat (Ngt)</b>               |        |        |                 |             |                                                                          |                          |          |                                                             |                      |
| Nabbegat 1                          | 173640 | 413080 | OSL             | NCL-5306087 | 203                                                                      | 12                       | ACTIVITY | Van Mourik et al. (2012)                                    |                      |
| Nabbegat 2                          | 173640 | 413080 | OSL             | NCL-5306088 | 236                                                                      | 11                       | TPQ soil | Van Mourik et al. (2012)                                    |                      |
| Nabbegat 3                          | 173640 | 413080 | OSL             | NCL-5306089 | 330                                                                      | 14                       | TPQ soil | Van Mourik et al. (2012)                                    |                      |
| <b>Rakt (Rkt)</b>                   |        |        |                 |             |                                                                          |                          |          |                                                             |                      |
| Rakt 1                              | 168100 | 409000 | OSL             | NCL-5207122 | 1940                                                                     | 89                       | TPQ      | Van Mourik et al. (2012); Doorenbosch and Van Mourik (2016) | soil, Likely OK      |
| Rakt 2                              | 168100 | 409000 | OSL             | NCL-5207121 | 590                                                                      | 37                       | TPQ      | Van Mourik et al. (2012); Doorenbosch and Van Mourik (2016) | soil, Likely OK      |
| Rakt 3                              | 168100 | 409000 | OSL             | NCL-5207120 | 410                                                                      | 17                       | TPQ      | Van Mourik et al. (2012); Doorenbosch and Van Mourik (2016) | soil, Likely OK      |
| Rakt 4                              | 168100 | 409000 | OSL             | NCL-5207119 | 350                                                                      | 14                       | TPQ      | Van Mourik et al. (2012); Doorenbosch and Van Mourik (2016) | soil, Likely OK      |
| Rakt 5                              | 168100 | 409000 | OSL             | NCL-5207118 | 230                                                                      | 9                        | TPQ      | Van Mourik et al. (2012); Doorenbosch and Van Mourik (2016) | soil, Likely OK      |
| Rakt 6                              | 168100 | 409000 | OSL             | NCL-5207117 | 200                                                                      | 8                        | ACTIVITY | Van Mourik et al. (2012); Doorenbosch and Van Mourik (2016) | Likely OK            |
| Rakt 7                              | 168100 | 409000 | OSL             | NCL-5207116 | 200                                                                      | 9                        | ACTIVITY | Van Mourik et al. (2012); Doorenbosch and Van Mourik (2016) | Likely OK            |
| <b>Sint Odilienberg (Sob)</b>       |        |        |                 |             |                                                                          |                          |          |                                                             |                      |
| Sint Odilienberg 1                  | 195275 | 350700 | OSL             | NCL-6108156 | 850                                                                      | 50                       | ACTIVITY | Kasse et al. (2016)                                         | OK                   |
| <b>Ter Stuift (Tst)</b>             |        |        |                 |             |                                                                          |                          |          |                                                             |                      |
| Ter Stuift                          | 110500 | 396600 | HIST            | -           |                                                                          |                          | TAQ      | Leenders (2016)                                             |                      |
| <b>Terp Heinis (Ths)</b>            |        |        |                 |             |                                                                          |                          |          |                                                             |                      |
| Terp Heinis                         | 152100 | 414150 | ARCH            | -           | 10-12 <sup>th</sup> century to 13 <sup>th</sup> 12 <sup>th</sup> century |                          |          | Goddijn (2014)                                              |                      |
| <b>Teteringen (Tet)</b>             |        |        |                 |             |                                                                          |                          |          |                                                             |                      |
| Teteringen                          | 116000 | 405000 | HIST            | -           |                                                                          |                          | TAQ      | Leenders (2016)                                             |                      |
| <b>Velden (Vld)</b>                 |        |        |                 |             |                                                                          |                          |          |                                                             |                      |
| Velden 1                            | 209409 | 381365 | OSL             | NCL-7815077 | 700                                                                      | 50                       | TAQ      | Van Asch et al. (2016); Wallinga and Versendaal (2016)      | OK, Plaggen          |
| Velden 2                            | 209409 | 381365 | OSL             | NCL-7815078 | 910                                                                      | 60                       | TAQ      | Van Asch et al. (2016); Wallinga and Versendaal (2016)      | OK, Plaggen          |
| Velden 3                            | 209409 | 381365 | OSL             | NCL-7815079 | 1900                                                                     | 300                      | ACTIVITY | Van Asch et al. (2016); Wallinga and Versendaal (2016)      |                      |
| Velden 4                            | 209409 | 381365 | ARCH            | -           | IR-MA (800 BC-AD 1500)                                                   |                          | TPQ      | Van Asch et al. (2016)                                      |                      |
| <b>Venloon (Vln)</b>                |        |        |                 |             |                                                                          |                          |          |                                                             |                      |
| Venloon                             | 133000 | 405000 | HIST            | -           |                                                                          |                          | ACTIVITY | Leenders (2016)                                             |                      |
| <b>Vliegend ven (Vlv)</b>           |        |        |                 |             |                                                                          |                          |          |                                                             |                      |
| Vliegend ven                        | 124300 | 396000 | HIST            | -           |                                                                          |                          | TAQ      | Leenders (2016)                                             |                      |
| <b>Wijchen</b>                      |        |        |                 |             |                                                                          |                          |          |                                                             |                      |
| Wijchen                             |        |        | <sup>14</sup> C | GrN-5481    | 3110                                                                     | 40                       | TPQ      | Vogel and Waterbolk (1972); Tolksdorf and Kaiser (2012)     | peat covered by dune |
| <b>Wijchen Martensterrein (WMa)</b> |        |        |                 |             |                                                                          |                          |          |                                                             |                      |
| Wijchen Martensterrein 2 (A)        | 178750 | 424350 | <sup>14</sup> C | Beta-272007 | 4880                                                                     | 40                       | TPQ      | Verhelst (2011); Willemse and Groenewoudt (2012)            |                      |
| Wijchen Martensterrein 3 (A)        | 178750 | 424350 | <sup>14</sup> C | Beta-27005  | 3770                                                                     | 40                       | TAQ      | Verhelst (2011); Willemse and Groenewoudt (2012)            |                      |
| Wijchen Martensterrein 4 (B)        | 178750 | 424350 | <sup>14</sup> C | Beta-267524 | 2870                                                                     | 40                       | TPQ      | Verhelst (2011); Willemse and Groenewoudt (2012)            |                      |
| Wijchen Martensterrein 5 (B)        | 178750 | 424350 | <sup>14</sup> C | Beta-267522 | 2840                                                                     | 40                       | TPQ      | Verhelst (2011); Willemse and Groenewoudt (2012)            |                      |
| Wijchen Martensterrein 6 (C)        | 178750 | 424350 | ARCH            | -           |                                                                          | 2 <sup>nd</sup> century  | TAQ      | Verhelst (2011); Willemse and Groenewoudt (2012)            |                      |
| Wijchen Martensterrein 7 (D)        | 178750 | 424350 | ?               | -           |                                                                          | 17 <sup>th</sup> century | ACTIVITY | Verhelst (2011); Willemse and Groenewoudt (2012)            |                      |

| Wijchen Meshallen (WMe)                                                                                                                                                                                                                                                                                                                                 |        |        |                 |                  |     |                                                                     |
|---------------------------------------------------------------------------------------------------------------------------------------------------------------------------------------------------------------------------------------------------------------------------------------------------------------------------------------------------------|--------|--------|-----------------|------------------|-----|---------------------------------------------------------------------|
| Wijchen Meshallen                                                                                                                                                                                                                                                                                                                                       | 178410 | 424760 | <sup>14</sup> C |                  | TPQ | Heirbout et al. (2010); Willemse and Groenewoudt (2012)             |
| Wijchen Molenberg (WMo)                                                                                                                                                                                                                                                                                                                                 |        |        |                 |                  |     |                                                                     |
| Wijchen Molenberg                                                                                                                                                                                                                                                                                                                                       | 178613 | 424652 | ARCH            | LBR (1100-800BC) | TPQ | Hendriks and Magnée-Nentjes (2008); Willemse and Groenewoudt (2012) |
| <sup>1)</sup> Type of age estimates: ARCH Archaeological ages, HIST historical ages. <sup>2)</sup> Age for <sup>14</sup> C is <sup>14</sup> C age BP, for OSL age, age before sampling. NEO - Neolithic (5300-2000 BC), BR - Bronze Age (2000-800 BC) IR - Iron Age (800-12BC), ROM - Roman Age (12 BC- AD 450), EMA - Early middle ages (AD 450-1050). |        |        |                 |                  |     |                                                                     |

## References

Appels F (2002) *Tussen Deventer en Epse: 10.000 jaar bewoningsgeschiedenis van het plangebied Epse-Noord*. Deventer.

Arts P (1993) De gemeentegrootte in West- en Zuid-Europa. Een kwantitatieve benadering. *Tijdschrift van de Belgische vereniging voor aardrijkskundige studies* 62: 377–404.

Arts P (1999) De grootte van de parochies in het hertogdom Brabant in de eerste helft van de zestiende eeuw. *Noordbrabants Historisch Jaarboek* 16: 141–159.

Ball EAG and Jansen R (2002) *Van steentijd tot middeleeuwen: Archeologisch onderzoek rond een fossiele beekloop te Herpen-Wilgendaal*. Leiden.

Berendsen HJA and Zagwijn WH (1984) Some conclusions reached at the symposium on geological changes in the western Netherlands during the period 1000-1300 AD. *Geologie en Mijnbouw* 63: 225–229.

Berns J (1886) *Rechtsbronnen der stad Harderwijk*. Den Haag.

Bielemans J (1987) Boeren op het Drentse zand 1600-1910. Een nieuwe visie op de “oude” landbouw. *AAG Bijdragen* 29.

Bohncke SJP (1991) Palaeohydrological changes in the Netherlands during the last 13.000 years. PhD thesis.

Brinkkemper O (2013) Pollenonderzoek waterputten W3 en W4. In: Mittendorf E, Vermeulen B and Wal M van der (eds) *Op Kloostergronden. Archeologisch, (bouw)historisch en landschappelijk onderzoek naar het erf De Olthof en de naastgelegen watermolen in Epse-Noord, Rapportage Archeologie Deventer* 38, 92–98.

Bronk Ramsey CB (2009) Bayesian analysis of radiocarbon dates. *Radiocarbon* 51(1): 337–360.

Broström A, Gaillard M-J, Ihse M and Odgaard BV (1998) Pollen-landscape relationships in modern analogues of ancient cultural landscapes in southern Sweden - a first step towards quantification of vegetation openness in the past. *Vegetation History and Archaeobotany* 7(4): 189–201. Available at: <http://www.springerlink.com/index/10.1007/BF01146193>: doi:Doi 10.1007/Bf01146193.

Bruins HJ (1981) Vechten tegen het zand. Stuifzandbestrijding in de marken langs de Vecht. *Bijdragen uit het land van IJssel en Vecht* 4: 7–21.

Candel JHJ, Makaske B, Storms JEA and Wallinga J (2016) Oblique aggradation: a novel explanation for sinuosity of low-energy streams in peat-filled valley systems. *Earth Surface Processes and Landforms*: doi:doi: 10.1002/esp.4100.

Castel IY (1991) Late Holocene eolian drift sands in Drenthe (the Netherlands). Utrecht University.

Deeben J, Groenewoudt B, Hallewas D, Van Rooijen C and Zoetbrood P (2005) Op zoek naar de archeologische voorraad. In: Van den Driesch MH and Willems WJH (eds) *Innovatie in de Nederlandse archeologie. Liber amicorum voor Roel W. Brandt*. Gouda, 37–54.

De Boer E (2010) *Gemert-Bakel (NB) – Bakel, Bernhardstraat: Archeologisch bureau- en inventariserend veldonderzoek (karterende fase)*.

De Jong J (1982) Chronostratigraphic subdivision of the Holocene in the Netherlands. In: Mangerud J, Birks H and Jäger, K-D (eds) *Uppsala*, 71–74.

De Leeuwe. R. (2014) *Geldrop Luchen: Opgraving van een nederzetting uit de periode bronstijd-vroege ijzertijd te Geldrop Luchen*. Leiden.

De Roo H (1953) Enkele bodemkundige aantekeningen over de Drentse essen. *Boor en Spade* 6: 59–76.

Diepeveen M and Enkevort H (2009) *Aan de rand van een middeleeuwse nederzetting*. Nijmegen.

Doorenbosch M (2013) *Ancestral heaths: reconstructing the barrow landscape in the Central and Southern Netherlands*. Sidestone Press.

Doorenbosch M and Van Mourik JM (2016) The impact of ancestral heath management on soils and landscapes: a reconstruction based on paleoecological analyses of soil records in the middle and southeast Netherlands. *Soil* 2(January): 311–324. Available at: <http://www.soil-discuss.net/soil-2015-83/>.

Donders TH, Bunnik FPM and Bouman MTIJ (2010) *De Nederlandse biostratigrafie database, v1.0: pollen biozones*, TNO Rapport TNO-034-UT-2010-01172, Utrecht.

Engels S, Bakker M, Bohncke S, Cerli C, Hoek W, Jansen B, et al. (2016) Centennial-scale lake-level lowstand at Lake Uddelermeer (The Netherlands) indicates changes in moisture source region prior to the 2.8-kyr event. *The Holocene* (March): 1–17. Available at: <http://hol.sagepub.com/cgi/doi/10.1177/0959683616632890>: doi:10.1177/0959683616632890.

Ellenkamp GR (2015) *Cluster 5, tracé aansluitleiding GOS Milheeze. Gemeente Deurne, archeolandschappelijk onderzoek*. Weesp.

Faber JA (1965) Population changes and economic development in the northern Netherlands: a historical survey. *A.A.G. Bijdragen* 12: 47–110.

Frenzel B (1994) Evaluation of land surfaces cleared from forests in the Roman Iron Age and the time of migrating Germanic tribes based on regional pollen diagrams. *Gustav Fischer Verlag*.

Frenzel B, Reisch L and Gläse B (1992) Evaluation of land surfaces cleared from forests by prehistoric man in Early Neolithic times and the time of migrating Germanic tribes. *Gustav Fischer Verlag*.

Gerrets DA, Opbroek M and Williams GL (2012) *Onvoltooid verleden: sporen van meer dan 10.000 jaar menselijke activiteit langs de Regge bij Nijverdal*. Amersfoort.

Goddijn M (2014) *Archeologisch onderzoek naar de bewonings- geschiedenis van locaties Terp Heinis (BZWV-04), Overdijk (BZWV-08) en De Drieborgt (BZWV-16): Archeologische begeleiding in het kader van de aanleg van het Máximakanaal (gemeente 's-Hertogenbosch)*. Available at: [http://www.archol.nl/PDF/Archol\\_Rapport\\_206.pdf](http://www.archol.nl/PDF/Archol_Rapport_206.pdf).

Groenewoudt BJ (1994) Prospectie, waardering en selectie van archeologische vindplaatsen: een beleidsgerichte verkenning van middelen en mogelijkheden. Amsterdam, Amsterdam University.

Groenman-Van Waateringe W (1986) Grazing Possibilities in the Neolithic of the Netherlands based on Palynological Data. *Anthropogenic Indicators in Pollen Diagrams*, Rotterdam: 187-202.

Groenman-Van Waateringe W (1988) Palynology of plaggen soils on the Veluwe, Central Netherlands. *Man-made soils, B.A.R. International* 41: 55–65.

Habermehl DS and Van Renswoude J (2014) *Duizenden jaren wonen op een rivierduin: Archeologisch onderzoek naar sporen van nederzettingsactiviteit tussen het Mesolithicum en de Nieuwe Tijd te Cuijk-De Nielt*. .

Harsema OH (1971) Kroniek van opgravingen en vondsten in Drenthe in 1969. *Nieuwe Drentse Volksalmanak* 89: 175–180.

Heidinga HA (1984a) Indications of severe drought during the 10th-century AD from an inland dune area in the central Netherlands. *Geologie and Mijnbouw* 63(3): 241–248.

Heidinga HA (1984b) De Veluwe in de vroege middeleeuwen: aspecten van de nederzettingsarcheologie van Kootwijk en zijn buuren.

Heidinga HA (1987) *Medieval Settlement and Economy North of the Lower Rhine: Archeology and History of Kootwijk and the Veluwe (the Netherlands)*. Van Gorcum Ltd.

Hendriks J and Magnée-Nentjes M (2008) *Graven aan de Molenberg: Archeologisch onderzoek van een grafveld uit de Romeinse tijd langs de Baron van d'Osysteet te Wijchen*. Nijmegen.

Heirbout ENA, Hendriks J and Hermsen. I (2010) *Onder een deken van zand. Archeologisch onderzoek op de Meshallen en de Kraanvogel te Wijchen*. Nijmegen.

Hermsen I (2005) *De bodem onder de belt. Archeologie en geschiedenis van een agrarisch gebied in de Voorstad van Deventer. Interne rapportages Archeologie Deventer*. Deventer.

Holl J (2011) *Stationslaan 28, Nunspeet: Een Inventariserend Veldonderzoek in de vorm van een verkennend booronderzoek*. Amersfoort.

Hulst R (1971) Verslagen provinciale archeologen, vondsten en verkenningen: Bergharen. *Jaarverslag 1971 van de Rijksdienst voor het Oudheidkundig Bodemonderzoek* 80.

Hulst R (1972) Verslagen provinciale archeologen, vondsten en verkenningen: Bergharen. *Jaarverslag 1972 van de Rijksdienst voor het Oudheidkundig Bodemonderzoek* 97.

Janssen A (1977) Het Wijkse Veld te Bergharen (Gelderland). *Westerheem* 26(6): 249–261.

Kasse C, Van Balen RT, Bohncke SJP, Wallinga J and Vreugdenhil M (2016) Climate and base-level controlled fluvial system change and incision during the last glacial–interglacial transition, Roer river, the Netherlands – western Germany. *Netherlands Journal of Geosciences* (December): 1–22. Available at: [http://www.journals.cambridge.org/abstract\\_S0016774616000500](http://www.journals.cambridge.org/abstract_S0016774616000500): doi:10.1017/njg.2016.50.

Klarenbeek R and Verlinde AD (1982) Varsen, gem. Ommen. In: Verlinde AD (ed) *AKO 1980-1981*, 197–202.

Kossmann EH (1986) *De Lage Landen 1780-1890*. Amsterdam.

Koster EA (1978) De stuifzanden van de Veluwe: een fysisch-geografische studie (The aeolian drift sands of the Veluwe, Central Netherlands); a physical geographical study. Universiteit van Amsterdam.

Koster EA, Castel IY and Nap RL (1993) Genesis and sedimentary structures of late Holocene aeolian drift sands in northwest Europe. *Geological Society Special Publication* 72(72): 247–267: doi:10.1144/GSL.SP.1993.072.01.20.

Lanting JN and Mook WG (1977) *The pre- and pro to history of the Netherlands in terms of radiocarbon dates*. Groningen.

Lascaris MA (1993) Stuifzand: natuur- en cultuurlandschap Analyse van de wisselwerking tussen menselijk handelen en natuurlijke factoren zoals die plaatsvond tijdens het ontstaan, blijven bestaan en verdwijnen van (post)middeleeuwse stuifzanden, toegespitst op het noordwest. Amsterdam, University of Amsterdam.

Lascaris MA (1999) Zandverstuivingen op de noordwestelijke Veluwe. *Historisch geografisch tijdschrift* 54–63.

Leenders KAHW (2016) Datering zandverstuiving in Zuid-Brabant. 54.

Louwe Kooijmans LP, Van den Broeke PW, Fokkens H and Van Gijn A (2011) *Nederland in de prehistorie*. Amsterdam.

McEvedy C and Jones R (1978) *Atlas of World Population History, Facts on File*. Harmondsworth: Penguin Books Ltd.

Mittendorff E (2013) *Archeologische begeleiding aanleg nutsleidingen Natuurderij, gemeente Deventer*. Deventer.

Modderman PJR (1955) Woonsporen uit de bronstijd en de ijzertijd op de Margijnen Enk onder Deventer. *Berichten van de Rijksdienst voor het Oudheidkundig Bodemonderzoek* 6: 22–31.

Modderman PJR, Bakker JP and Heidinga HA (1976) Nederzettingssporen uit m-neol(TRB), LB en ME in het beekhuizer zand onder Harderwijk. *Analecta Praehistorica Leidensia* 9: 68–69.

Niu M, Heaton TJ, Blackwell PG, Buck CE (2013) The Bayesian approach to radiocarbon calibration curve estimation: the IntCal13, Marine13, and SHCal13 methodologies. *Radiocarbon* 55(4):1905–1922.

Verwers W (1990) *Archeologische kroniek van Noord-Brabant 1985-1987*. Waalre: Stichting Brabants Heem.

Paping R (2009) Urbanisatie en de-urbanisatie in Nederland 1400-1850. *Paper presented at Second Dag van de Historische Demografie, Tilburg, 4 december 2009*.

Prangma NM (2005) *Wierden-Almelo Rijksweg 35/36 IVO3 Locatie 1 en 5, Huurne*.

Quik C (2016) Historical morphodynamics of the Overijsselse Vecht: Extreme lateral migration of meander bends caused by drift-sand activity? Wageningen, Wageningen University.

Reimann T and Voskuilen E (2016) *Luminescentiedateringsrapport NCL-5315, Netherlands Centre for Luminescence dating, 9p*.

Reimer PJ, Bard E, Bayliss A, Beck JW, Blackwell PG, Bronk Ramsey C, et al. (2013) IntCal13 and Marine13 radiocarbon age calibration curves 0-50,000 years cal BP. *Radiocarbon* 55(4): 1869–1887: doi:http://doi.org/10.2458/azu\_js\_rc.55.16947.

Roymans N and Gerritsen F (2002) Landscape, Ecology and Mentalitas: a Long-term Perspective on Developements in the Meuse-Demer-Scheldt Region. *Proceedings of the prehistorical society* 68: 257–287.

Sevink J, Koster EA, Van Geel B and Wallinga J (2013) Drift sands, lakes, and soils: The multiphase Holocene history of the Laarder Wasmeren area near Hilversum, the Netherlands. *Geologie en Mijnbouw/Netherlands Journal of Geosciences* 92(4): 243–266: doi:10.1017/S0016774600000196.

Slicker van Bath BH (1957) *Een samenleving onder spanning, geschiedenis van het platteland in Overijssel*. Assen.

Spek T (2004) *The open field village landscape in Drenthe: a historical-geographical study*. Stichting Matrijs.

Sugita S, Gaillard M J and Broström A (1999) Landscape openness and pollen records: a simulation approach. *The Holocene* 9(4): 409–421: doi:10.1191/095968399666429937.

Sugita S, Parshall T, Calcote R and Walker K (2010) Testing the Landscape Reconstruction Algorithm for spatially explicit reconstruction of vegetation in northern Michigan and Wisconsin. *Quaternary Research* 74(5): 289–300.

Taayke E, van Westing H and Wubbels B (1978) Een akkerlandje uit de voorromeinse IJzertijd te Uffelte, gem. Havelte. *Nieuwe Drentse Volksalmanak* 95: 259–277.

Teunissen D (1990) Palynologisch onderzoek in het oostelijk rivierengebied—een overzicht. *Mededelingen van de afdeling Biogeologie van de Discipline Biologie van de Katholieke Universiteit van Nijmegen* 16: 163.

Teunissen D (1997) *De geheimen van enkele veenvoorkomens bij Heeswijk-Dinther in oostelijk Noordbrabant (Moerven, Wildhorst)*.

Theuws F (1989) Middeleeuwse parochiecentra in de Kempen 1000-1350. In: A.A.A.Verhoeven and Theuws F (eds) *Het Kempenproject 3. De Middeleeuwen centraal*. Waalre, 97–216.

- Tolksdorf JF and Kaiser K (2012) Holocene aeolian dynamics in the European sand-belt as indicated by geochronological data. *Boreas* 41(3): 408–421: doi:10.1111/j.1502-3885.2012.00247.x.
- Van Asch N, Bos JAA, Brijker J, Van Dinter M, Gouw-Bouman MTIJ, Jaspers NL, et al. (2015) *Zeist, Het Rond – Vierde Kwadrant (gemeente Zeist) Resultaten van een proefsleuvenonderzoek en een opgraving*. Amersfoort.
- Van Asch N, Drenth E, Griffioen AAJ, Melkert MJA, Moolhuizen C, Rijk PTA de, et al. (2016) *De Vilgert II te Velden, gemeente Venlo: een archeologische opgraving*. Amersfoort.
- Van Bavel BJP (1999) Transitie en continuïteit. De bezitsverhoudingen en de plattelandseconomie in het westelijke gedeelte van het Gelderse rivierengebied ca. 1300 - ca. 1570. *Werken Gelre* 52, Hilversum.
- Van Beek R (2009) Reliëf in tijd en ruimte." Interdisciplinair onderzoek naar bewoning en landschap van Oost-Nederland tussen vroege prehistorie en middeleeuwen. Wageningen, Wageningen University.
- Van Beek R and Groenewoudt BJ (2011) An Odyssey along the River Vecht in the Dutch-German border area. A Regional Analysis of Roman-period Sites in Germania Magna. *Germania* 89(1–2): 157–190.
- Van der Molen P and Hoekstra S (1988) A palaeoecological study of a hummock-hollow complex from Engbertsdijksveen, in the Netherlands. *Review of Palaeobotany and Palynology* 56(3–4): 213–274.: doi:10.1016/0034-6667(88)90060-7.
- Van der Waals JD (1962) Kroniek van opgravingen en vondsten in Drenthe in 1960. *Nieuwe Drentse Volksalmanak* 80: 303–313.
- Van der Waals JD (1963) Een huisplattegrond uit de vroege ijzertijd te Een, gem. Norg. *Nieuwe Drentse Volksalmanak* 81: 217–229.
- Van Doesburg J (2009) Fighting against wind and sand: Settlement development in the coastal dunes and the coversand region of the central Netherlands in the Middle Ages. *Ruralia* 7: 181–204. Available at: <http://www.brepolonline.net/doi/10.1484/M.RURALIA-EB.3.1170>.
- Van Doesburg J and Drenth E (2009) *Graven naar de context van een bronzen Vollgriffdolch en het middeleeuwse dorp Hees. Waardstellend archeologisch onderzoek in 2004 en 2005 te Den Dolder (prov. Utrecht)*. RAM-rapport 170, Amersfoort.
- Van Doesburg J, De Kort JW and Schreurs J (2009) *Nederzetting in het Oud Reemsterzand*. Amersfoort.
- Van Es WA (1958) Een versterkte nederzetting te Vries; voorlopig bericht. *Nieuwe Drentse Volksalmanak* 76: 50–66.
- Van Es WA (1965) Wijster; a native village beyond the Imperial frontier 150-425 A.D. *Palaeohistoria* 11: 1–595.
- Vangheluwe D and Spek T (2008) De laatmiddeleeuwse transitie van landbouw en landschap in de Noord-Brabantse Kempen. *Historisch-Geografisch Tijdschrift* 26(1): 1–23.
- Van Giffen AE (1951) De Havelterberg en omgeving bij Havelte, gem. Havelte. Opgravingen in 1918, 1943, 1944 en 1946. *Nieuwe Drentse Volksalmanak* 69: 97–137.
- Van Gijn AL and Waterbolk HT (1984) The colonization of the salt marshes of Friesland and Groningen: the possibility of a transhumant prelude. *Palaeohistoria* 26: 22.
- Verhelst E (2011) *Wroeten in de Valendries: Bewoningssporen uit de Late Bronstijd en de Vroeg Romeinse tijd op het Martensterrein in Wijchen*.
- Van Mourik JM (1988) Landschap in beweging: Ontwikkeling en bewoning van een stuifzandlandschap in de Kempen. *Netherlands Geographical Studies* 74: 191.
- Van Mourik JM, Nierop KGJ and Vandenberghe DAG (2010) Radiocarbon and optically stimulated luminescence dating based chronology of a polycyclic driftsand sequence at Weerterbergen (SE Netherlands). *Catena*. Elsevier B.V. 80(3): 170–181. Available at: <http://dx.doi.org/10.1016/j.catena.2009.11.004>.
- Van Mourik JM, Seijmonsbergen AC, Slotboom RT and Wallinga J (2012) Impact of human land use on soils and landforms in cultural landscapes on aeolian sandy substrates (Maashorst, SE-Netherlands). *Quaternary International*. Elsevier Ltd and INQUA 265: 74–89. Available at: <http://dx.doi.org/10.1016/j.quaint.2011.06.053>.
- Van Munster, B (2012) Landscape changes in the Netherlands during the Late Roman period and the Early Middle Ages (A.D. 270-525), a multi disciplinary approach combining changes in demography, physical landscape and climate, Intership report, Cultural Heritage Agency, Amersfoort.
- Van Tent W (1985) De opgravingen van Oud-Leusden. *Tijdschrift Flehite* 17(1–2): 10–17.
- Van Tent W (1988) *Leusden, Archeologische Kroniek van de provincie Utrecht over de jaren 1980-1984*. Utrecht.
- Vandenberghe DAG, Derese C, Kasse C and Van den Haute P (2013) Late Weichselian (fluvio-)aeolian sediments and Holocene drift-sands of the classic type locality in Twente (E Netherlands): A high-resolution dating study using optically stimulated luminescence. *Quaternary Science Reviews*. Elsevier Ltd 68: 96–113. Available at: <http://dx.doi.org/10.1016/j.quascirev.2013.02.009>.
- Veldman HAP and Kenemans MC (2005) *Een rivierduin in Gaanderen, Beekstraat en Leuveninkstraat IVO-3. Een inventariserend veldonderzoek in de vorm van proefsleuven*. Amersfoort.

Verhagen P and Borsboom A (2009) The design of effective and efficient trial trenching strategies for discovering archaeological sites. *Journal of Archaeological Science* 36(8): 1807–1815.: doi:<http://dx.doi.org/10.1016/j.jas.2009.04.010>.

Verlinde AD (1972) Ommen Archeologisch Nieuws. *Nieuwsbulletin van de Koninklijke Nederlandse Oudheidkundige Bond* 11: 128.

Verlinde AD (2001) Dalfsen-Hessum, overstoven grafheuveltjes. In: Verlinde AD (ed) *AKO 2000*.

Verlinde AD (2004) De Germaanse nederzetting te Denekamp binnen een regionaal archeologisch kader van de Romeinse tijd. *OHB* 119: 57–92.

Verlinde AD and Erdrich M (2006) Het Germaanse grafveld te Deventer-Colmschate, opgraving 1984. In: Groenewoudt BJ, Heeringen RM van and Scheepstra GH (eds) *Het zandeilandenrijk van Overijssel. Bundel verschenen ter gelegenheid van de pensionering van A.D. Verlinde als archeoloog in, voor en van Overijssel*. NAR 22, 271–382.

Vermunt MA and Van der Kallen (2012) *Opgravingen in Bergen op Zoom*. Utrecht: Matrijs.

Vogel J and Waterbolk H (1972) Groningen radiocarbon dates X. *Radiocarbon* 14(1): 6–110.

Wallinga J, Ouden J Den, Cunningham AC, Copini P, Versendaal AJ, Sass-Klaassen UGW, et al. (2012) Bootstrap-Bayesian OSL approach for poorly-bleached sediment sequences tested with dendrochronological age constraints. *Geophysical Research Abstracts EGU General Assembly*.

Wallinga J and Versendaal AJ (2012) *Luminescentiedateringsrapport NCL-7610, Netherlands Centre for Luminescence dating, 5p*.

Wallinga J and Versendaal AJ (2016) *Luminescentiedateringsrapport NCL-7815, Netherlands Centre for Luminescence dating, 12p*.

Wartena R (1975) Ontginningen en “Wüstungen” op de Veluwe in de veertiende eeuw. *Bijdragen en mededelingen LXVIII. Gelre, vereniging tot beoefening van Geldersche geschiedenis, oudheidkunde. recht, Arnhem* 1–50.

Waterbolk HT (1957) Naar een Saksische hutkom op de Emelang en een samengestelde grafheuvel op de Eese. *Nieuwe Drentse Volksalmanak* 75: 1–12.

Waterbolk HT (1959) Nieuwe gegevens over de herkomst van de oudste bewoners der kleistreken. *Akademiedagen* 11: 16–37.

Waterbolk HT (1977) Walled enclosures of the Iron Age in the north of the Netherlands. *Palaeohistoria* 19: 97–172.

Waterbolk HT and Van Andel TH (1951) Stuifzandprofielen te Havelte. *Nieuwe Drentse Volksalmanak* 69: 141–156.

Willemse NW and Groenewoudt BJ (2012) Resilience of Meta-Stable Landscapes? The Non-Linear Response of Late Glacial Aeolian Landforms to Prehistoric Reclamation along Dutch River Valleys. *Landscape Archaeology. Proceedings of the International Conference Held in Berlin, 6th – 8th June 2012* 3: 245–255.

Witte C (2016) Stuifzandbestrijding op de Veluwe 1500-1884: De invloed van gewestelijk overheidsbeleid op het functioneren van de buurschap Harskamp als collectieve institutie. Groningen, University of Groningen.

Zoetbrood P, Van Rooijen C, Lauwerier R, Van Haaff G and Van As A (2006) *Uit balans: Wordingsgeschiedenis en analyse van het bestand van wettelijk beschermde archeologische vindplaatsen*. Amersfoort.
